# Supplementary material
Source: ML conference proceedings conference paper supplement (https://proceedings.mlr.press/v97/ward19a.html)
Supplement: Supplementary file [file ward19a-supp.pdf]

---

## Supplementary Material for AdaGrad Stepsizes: Sharp Convergence Over Nonconvex Landscapes

---

### A. The Proof of Second Bound in Theorem 2.2

First, observe with probability  $1 - \delta'$  that

$$\sum_{i=0}^{N-1} \|\nabla F_i - G_i\|^2 \leq \frac{N\sigma}{\delta'}.$$

Let  $Z = \sum_{k=0}^{N-1} \|\nabla F_k\|^2$ , then

$$\begin{aligned} & b_{N-1}^2 + \|\nabla F_{N-1}\|^2 + \sigma^2 \\ &= b_0^2 + \sum_{i=0}^{N-2} \|G_i\|^2 + \|\nabla F_{N-1}\|^2 + \sigma^2 \\ &\leq b_0^2 + 2 \sum_{i=0}^{N-1} \|\nabla F_i\|^2 + 2 \sum_{i=0}^{N-2} \|\nabla F_i - G_i\|^2 + \sigma^2 \\ &\leq b_0^2 + 2Z + 2N \frac{\sigma^2}{\delta'} \end{aligned}$$

In addition, from equality (10), i.e,

$$\mathbb{E} \left[ \frac{\sum_{k=0}^{N-1} \|\nabla F_k\|^2}{2\sqrt{b_{N-1}^2 + \|\nabla F_{N-1}\|^2 + \sigma^2}} \right] \leq \frac{F_0 - F^*}{\eta} + \frac{4\sigma + \eta L}{2} \log \left( 10 + \frac{20N(\sigma^2 + \gamma^2)}{b_0^2} \right) \triangleq \mathcal{Q}$$

we have with probability  $1 - \hat{\delta} - \delta'$  that

$$\begin{aligned} \frac{\mathcal{Q}}{\hat{\delta}} &\geq \frac{\sum_{k=0}^{N-1} \|\nabla F_k\|^2}{2\sqrt{b_{N-1}^2 + \|\nabla F_{N-1}\|^2 + \sigma^2}} \\ &\geq \frac{Z}{2\sqrt{b_0^2 + 2Z + 2N\sigma^2/\delta'}} \end{aligned}$$

That is equivalent to solve the following quadratic equation

$$Z^2 - \frac{8\mathcal{Q}^2}{\hat{\delta}^2} Z - \frac{4\mathcal{Q}^2}{\hat{\delta}^2} \left( b_0^2 + \frac{2N\sigma^2}{\delta'} \right) \leq 0$$

which gives

$$\begin{aligned} Z &\leq \frac{4\mathcal{Q}^2}{\hat{\delta}^2} + \sqrt{\frac{16\mathcal{Q}^4}{\hat{\delta}^4} + \frac{4\mathcal{Q}^2}{\hat{\delta}^2} \left( b_0^2 + \frac{2N\sigma^2}{\delta'} \right)} \\ &\leq \frac{8\mathcal{Q}^2}{\hat{\delta}^2} + \frac{2\mathcal{Q}}{\hat{\delta}} \left( b_0 + \frac{\sqrt{2N}\sigma}{\sqrt{\delta'}} \right) \end{aligned}$$

Let  $\hat{\delta} = \delta' = \frac{\delta}{2}$ . Replacing  $Z$  with  $\sum_{k=0}^{N-1} \|\nabla F_k\|^2$  and dividing both side with  $N$  we have with probability  $1 - \delta$

$$\min_{k \in [N-1]} \|\nabla F_k\|^2 \leq \frac{4\mathcal{Q}}{N\delta} \left( \frac{8\mathcal{Q}}{\delta} + 2b_0 \right) + \frac{8\mathcal{Q}\sigma}{\delta^{3/2}\sqrt{N}}.$$

**A. Tables**

**Table 1:** Statistics of data sets. DIM is the dimension of a sample

| DATASET  | TRAIN     | TEST   | CLASSES | DIM     |
|----------|-----------|--------|---------|---------|
| MNIST    | 60,000    | 10,000 | 10      | 28×28   |
| CIFAR-10 | 50,000    | 10,000 | 10      | 32×32   |
| IMAGENET | 1,281,167 | 50,000 | 1000    | VARIOUS |

**Table 2:** Architecture for five-layer neural network (LeNet)

| LAYER TYPE            | CHANNELS | OUT DIMENSION |
|-----------------------|----------|---------------|
| 5 × 5 CONV RELU       | 6        | 28            |
| 2 × 2 MAX POOL, STR.2 | 6        | 14            |
| 5 × 5 CONV RELU       | 16       | 10            |
| 2 × 2 MAX POOL, STR.2 | 6        | 5             |
| FC RELU               | N/A      | 120           |
| FC RELU               | N/A      | 84            |
| FC RELU               | N/A      | 10            |

**B. Implementing the Algorithm in a Neural Network**

In this section, we give the details for implementing our algorithm in a neural network. In the standard neural network architecture, the computation of each neuron consists of an elementwise nonlinearity of a linear transform of input features or output of previous layer:

$$y = \phi(\langle w, x \rangle + b), \tag{11}$$

where  $w$  is the  $d$ -dimensional weight vector,  $b$  is a scalar bias term,  $x, y$  are respectively a  $d$ -dimensional vector of input features (or output of previous layer) and the output of current neuron,  $\phi(\cdot)$  denotes an elementwise nonlinearity.

For fully connected layer, the stochastic gradient  $G$  in Algorithm 1 represents the gradient of the current neuron (see the green curve, Figure 5). Thus, when implementing our algorithm in PyTorch, AdaGrad-Norm is one learning rate associated to one neuron for fully connected layer, while SGD has one learning rate for all neurons.

For convolutional layer, the stochastic gradient  $G$  in Algorithms 1 represents the gradient of each channel in the neuron. For instance, there are 6 learning rates for the first layer in the LeNet architecture (Table 1). Thus, AdaGrad Norm is one learning rate associated to one channel for convolutional layer .

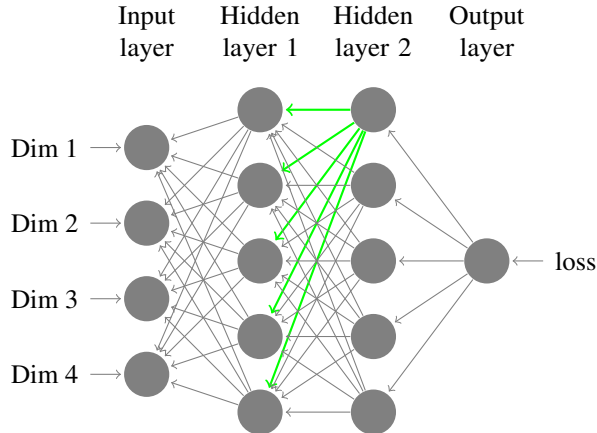

**Figure 5:** An example of backpropagation of two hidden layers. Green edges represent the stochastic gradient  $G$  in Algorithm 1

### C. Proof of Theorem 2.2

We will use the following lemma to argue that after an initial number of steps  $N = \lceil \frac{(\eta L)^2 - b_0^2}{\varepsilon} \rceil + 1$ , either we have already reached a point  $x_k$  such that  $\|\nabla F(x_k)\|^2 \leq \varepsilon$ , or else  $b_N \geq \eta L$ .

**Lemma C.1.** Fix  $\varepsilon \in (0, 1]$  and  $L > 0$ . For any non-negative  $a_0, a_1, \dots$ , the dynamical system

$$b_0 > 0; \quad b_{j+1}^2 = b_j^2 + a_j$$

has the property that after  $N = \lceil \frac{(\eta L)^2 - b_0^2}{\varepsilon} \rceil + 1$  iterations, either  $\min_{k=0:N-1} a_k \leq \varepsilon$ , or  $b_N \geq \eta L$ .

*Proof.* If  $b_0 \geq \eta L$ , we are done. Else, let  $N$  be the smallest integer such that  $N \geq \frac{(\eta L)^2 - b_0^2}{\varepsilon}$  and suppose  $b_N < \eta L$ . Then

$$(\eta L)^2 > b_N^2 = b_0^2 + \sum_{k=0}^{N-1} a_k.$$

which implies  $\sum_{k=0}^{N-1} a_k \leq (\eta L)^2 - b_0^2$  and hence, for  $N \geq \frac{(\eta L)^2 - b_0^2}{\varepsilon}$ ,

$$\min_{k=0:N-1} a_k \leq \frac{1}{N} \sum_{k=0}^{N-1} a_k \leq \frac{(\eta L)^2 - b_0^2}{N} \leq \varepsilon.$$

□

The following Lemma C.2 guarantees that the sequence  $b_0, b_1, \dots$  converges to a finite limit  $b_{\max} > 0$  and that  $b_{\max}$  cannot be much larger than  $2L + C$  where  $C$  depends on initialization.

**Lemma C.2.** Suppose  $F \in C_L^1$  and  $F^* = \inf_x F(x) > -\infty$ . Denote by  $k_0 \geq 1$  the first index such that  $b_{k_0} \geq \eta L$ . Then for all  $k \geq k_0$ ,

$$b_k \leq b_{k_0-1} + 2(F(x_{k_0-1}) - F^*)/\eta \quad (12)$$

and moreover,

$$F(x_{k_0-1}) - F^* \leq F(x_0) - F^* + \frac{\eta^2 L}{2} \left(1 + 2 \log \frac{b_{k_0-1}}{b_0}\right). \quad (13)$$

*Proof.* Suppose  $k_0 \geq 1$  is the first index such that  $b_{k_0} \geq \eta L$ . Then  $b_j \geq \eta L$  for all  $j \geq k_0$ , and by Lemma 3.1, for  $j \geq 0$ ,

$$\begin{aligned} F(x_{k_0+j}) &\leq F(x_{k_0+j-1}) - \frac{\eta}{b_{k_0+j}} \left(1 - \frac{\eta L}{2b_{k_0+j}}\right) \|\nabla F(x_{k_0+j-1})\|^2 \\ &\leq F(x_{k_0+j-1}) - \frac{\eta}{2b_{k_0+j}} \|\nabla F(x_{k_0+j-1})\|^2 \\ &\leq F(x_{k_0-1}) - \sum_{\ell=0}^j \frac{\eta}{2b_{k_0+\ell}} \|\nabla F(x_{k_0+\ell-1})\|^2. \end{aligned} \quad (14)$$

Taking  $j \rightarrow \infty$ ,

$$\sum_{\ell=0}^{\infty} \frac{\|\nabla F(x_{k_0+\ell-1})\|^2}{b_{k_0+\ell}} \leq 2(F(x_{k_0-1}) - F^*)/\eta.$$

Since the AdaGrad update can be equivalently written as

$$b_j = b_{j-1} + \frac{\|\nabla F(x_{j-1})\|^2}{b_j + b_{j-1}},$$

we find that

$$b_{k_0+j} \leq b_{k_0-1} + \sum_{\ell=0}^j \frac{\|\nabla F(x_{k_0+\ell-1})\|^2}{b_{k_0+\ell}} \leq b_{k_0-1} + 2(F(x_{k_0-1}) - F^*)/\eta \quad (15)$$

As for the upper bound of  $F(x_{k_0-1})$ , we invoke the Descent Lemma again, and have

$$\begin{aligned} F(x_{k_0-1}) - F(x_0) &\leq \frac{\eta^2 L}{2} \sum_{i=0}^{k_0-2} \frac{\|\nabla F(x_i)\|^2}{b_{i+1}^2} \\ &\leq \frac{\eta^2 L}{2} \sum_{i=0}^{k_0-2} \frac{(\|\nabla F(x_i)\|/b_0)^2}{\sum_{\ell=0}^i (\|\nabla F(x_\ell)\|/b_0)^2 + 1} \\ &\leq \frac{\eta^2 L}{2} \left( 1 + \log \left( 1 + \sum_{\ell=0}^{k_0-2} \frac{\|\nabla F(x_\ell)\|^2}{b_0^2} \right) \right) \\ &\leq \frac{\eta^2 L}{2} \left( 1 + \log \left( \frac{b_{k_0-1}^2}{b_0^2} \right) \right) \end{aligned} \quad (16)$$

where third step uses Lemma 3.2. □

### C.1. Proof of Theorem 2.2

*Proof.* By Lemma C.1, if  $\min_{k=0:N-1} \|\nabla F(x_k)\|^2 \leq \varepsilon$  is not satisfied after  $N = \lceil \frac{(\eta L)^2 - b_0^2}{\varepsilon} \rceil + 1$  steps, then there is a first index  $k_0 \leq N$  such that  $b_{k_0} > \eta L$ . By Lemma C.2, for all  $k \geq k_0$ ,

$$b_k \leq b_{k_0-1} + 2(F(x_{k_0-1}) - F^*)/\eta.$$

If  $k_0 = 1$ , it follows from (14) that

$$F(x_M) \leq F(x_0) - \frac{\eta \sum_{k=0}^{M-1} \|\nabla F(x_k)\|^2}{2(b_0 + 2(F(x_0) - F^*)/\eta)} \quad (17)$$

and thus the stated result holds straightforwardly.

Otherwise, if  $k_0 > 1$ , then set

$$b_{\max} = b_{k_0-1} + 2(F(x_{k_0-1}) - F^*)/\eta. \quad (18)$$

By Lemma 3.1, for any  $M \geq 1$ ,

$$\begin{aligned} F(x_{k_0+M}) &\leq F(x_{k_0+M-1}) - \frac{\eta}{2b_{k_0+M}} \|\nabla F(x_{k_0+M-1})\|^2 \\ &\leq F(x_{k_0+M-1}) - \frac{\eta}{2b_{\max}} \|\nabla F(x_{k_0+M-1})\|^2 \\ &\leq F(x_{k_0-1}) - \frac{\eta}{2b_{\max}} \sum_{\ell=0}^{M-1} \|\nabla F(x_{k_0+\ell})\|^2. \end{aligned}$$

Thus,

$$\begin{aligned} \min_{\ell=0:M-1} \|\nabla F(x_{k_0+\ell})\|^2 &\leq \frac{1}{M} \sum_{\ell=0}^{M-1} \|\nabla F(x_{k_0+\ell})\|^2 \\ &\leq \frac{2b_{\max}(F(x_{k_0-1}) - F^*)}{\eta M} \\ &= \frac{2(\eta b_{k_0-1} + 2(F(x_{k_0-1}) - F^*)) (F(x_{k_0-1}) - F^*)}{\eta^2 M} \\ &\leq \frac{4 \left( F(x_{k_0-1}) - F^* + \frac{\eta b_{k_0-1}}{4} \right)^2}{\eta^2 M} \end{aligned} \quad (19)$$

By Lemma C.2, we have

$$b_{k_0-1} \leq \eta L, \quad \text{and} \quad F(x_{k_0-1}) - F^* \leq F(x_0) - F^* + \frac{\eta^2 L}{2} \left(1 + 2 \log \frac{\eta L}{b_0}\right).$$

Thus, once

$$M \geq \frac{4 \left( (F(x_0) - F^*)/\eta + \left(\frac{3}{4} + \log \frac{\eta L}{b_0}\right) \eta L \right)^2}{\varepsilon},$$

we are assured that

$$\min_{k=0:N+M-1} \|\nabla F(x_k)\|^2 \leq \varepsilon$$

where  $N \leq \frac{L^2 - b_0^2}{\varepsilon}$ .

□
